# Supplementary material for: MiR-184 regulates insulin secretion through repression of Slc25a22
Source: PeerJ. 2013 Sep 24;1:e162. doi: 10.7717/peerj.162 (PMC3792180; doi:10.7717/peerj.162)
Supplement: Table S1 [file peerj-01-162-s001.xls]

## Sheet: Sheet1
344 genes (mouse)	550 genes (human)	45 genes (common)	1 gene (Slc25a22)
Cggbp1	CES2	Csf1	Slc25a22
Zbtb7c	PCSK6	Lasp1
Spry4	KCNK6	Ppap2b
Atp6v1g2	CLDN12	Lrrc8a
L3mbtl3	RAI1	Pttg1ip
Foxo1	PDXK	Aars
Nhlrc1	NAT9	Plxna2
Sh3bgrl	PTTG1IP	Ube3b
Lgr6	SLC22A3	Sidt2
Csf1	NLN	Adam19
Lasp1	SLC30A7	Pml
Ankrd23	STIM1	Gnas
Rbbp5	LDOC1L	Agrn
Ppap2b	FLJ39743	Bicd2
Rap2a	MTUS1	Prkcb1
Lrrc8a	LRRC20	Ldoc1l
Pttg1ip	PPP1R13L	Eln
Syngr1	ILF3	Gnas
Klhdc1	AMPD2	Prdm16
Phyhip	NCOR2	Nlgn2
Tcf7l2	ARL3	Inppl1
1300001I01Rik	TBKBP1	Bicd2
Efnb3	TPP1	Slc30a9
Rap2c	STK40	Bcl2l1
Sox9	ADO	Hand2
Qtrtd1	DNAJC18	Runx1
Cenpn	EPB41L5	Vti1a
Cxcl10	ELAVL3	Slc25a22
Kcng3	C17orf39	Rab1b
Tbc1d1	PNMAL1	Plagl2
Galnt10	C22orf29	Ubp1
Tars2	ULK1	Slc7a5
Cyp26b1	SF1	Mkl1
Aars	HIP1	Zfp3
Pars2	NFATC2IP	Ncor2
Otud7a	DGKD	Rab35
Ash1l	EPAS1	Crispld2
Cbx8	NRN1	Hic2
Ehd4	FLJ41603	Pitpnm2
Plxna2	SMAD5	Pomt2
Slc6a9	GNB1	Fbxo28
Trim46	C12orf53	Bin3
Zfp750	C5orf15	Atp1b2
Eif4ebp2	ZBTB41	Ppp1cc
P140	KIAA1751	Huwe1
Klhl18	GRK6
Ppp2r5c	CCDC69
Igfbp4	C16orf53
Lpp	FOXO3
Sarm1	INSIG1
Slc2a4	PPAP2B
Zc3h18	C8orf13
Becn1	SLC25A22
Rnase9	FLNB
Tmem132e	KCNC1
Wdr48	GSK3A
Bbs1	MGC3207
Ube3b	ADM2
Sidt2	C11orf9
Rprml	NR4A2
Tmem145	F5
Acads	SERTAD1
Slc7a1	ABO
Clcn7	FBXL18
Bri3bp	SLC15A2
Hadh	KIAA0515
Adam19	KIAA0284
Pml	ST8SIA2
Slco2b1	FOSB
Cab39	SMARCA4
Arhgdib	KIAA0226
Hand1	RASGEF1C
Stard5	SCML1
A230054D04Rik	DAG1
Slc38a7	KIAA1211
Pacs2	CPLX1
Pars2	NOS1
Kcmf1	XYLT1
Eif4h	DDX11
Hbs1l	KLHDC5
Trim46	PTPRT
Gnas	CBFA2T3
Camk2a	FBXO44
Tmie	CLN8
Agrn	AKR1C3
Creb3l1	RIMS4
Fchsd1	MIOX
Cmtm6	SNX18
Lrp5	SH2B3
6030436E02Rik	LASP1
Aoc3	PYGM
Bicd2	ELN
Smyd3	Gcom1
Akap12	BIN3
Cpne7	CHRNA4
Rspo4	PLTP
Supt16h	CHST10
Mboat1	LOC400506
Prkcb1	HERC2
Abat	DPYSL2
Nat8l	CTBP1
Grb2	PSKH1
Nipsnap1	C1QTNF6
Ankrd27	MAGEA5
Snx27	ACSF3
8430419L09Rik	BCL2L1
Pias4	RGMA
Rfx1	CCDC93
Sfrs12	TMEM24
Tiam1	MIP
Cdc42bpb	CD1E
2610528K11Rik	IL15RA
Wdr32	MKNK2
4930402E16Rik	CDC45L
Grsf1	ABHD8
Mbd3	INSIG1
Epha4	STC2
Timp3	C9orf32
Kcne1	NIBP
Zswim5	DHRS12
Ldoc1l	ZFR2
B4galt5	C1orf95
Fzd7	SH3GL1
Rlbp1l1	GRHL2
Eln	FANCF
Wasl	SLA
Gnas	POMT2
Elf4	GOT1
Prdm16	USP30
Nlgn2	SLC7A5
Krt25	CDC42EP4
Gper	HTR4
Ttc39c	B4GALNT1
Inppl1	SRC
Bicd2	CD1E
Pkd1	DGKQ
Mmp8	ZFP3
Ccdc47	EDARADD
Mrm1	ZBTB40
4732454E20Rik	FTCD
Dus4l	NOTCH2
Dicer1	EPB41
Ghrh	SFRP1
Meis2	PRICKLE2
S100pbp	NLGN2
A830007P12Rik	PPP2R4
Abca2	KIF3A
Zic4	AKT2
Slc30a9	NCOA1
Phka1	DLX1
Sv2a	MED29
Ssr4	PXMP4
Tbc1d5	MAMLD1
Amotl2	RGS11
Gabrb2	TDRD1
Pola2	SLC25A25
Tbc1d12	GABBR2
Snai1	C9orf152
Ppp1r9b	SPHK2
Cldn3	ADCY9
Raver1	CD79B
St3gal3	CAMKK2
Hk2	MAP6
Osbpl2	CLDN6
Npy5r	TRIM27
Sstr1	CTNNBIP1
Slamf7	FLJ10404
Tbc1d14	ZBTB39
Krtap17-1	SEPT9
Plekhb2	MMP16
P2rx7	LIMCH1
Hpcal1	FCRL5
Slc23a2	INTS1
4921536K21Rik	BICD2
Bcl2l1	ITGB4
Hand2	TP63
Pdap1	CRISPLD2
Enah	DAPP1
Ovol1	QSER1
Prkacb	FBXO28
Tsen54	TNFAIP2
Ap2m1	AGRN
Rps6kc1	NIP30
Runx1	SLC5A1
Nek6	PACSIN1
Celsr2	GPD1
Krt71	ICOSLG
Agpat3	HOXA9
Hs6st3	TXNDC17
Cdc42se1	TM7SF4
Epb4.1l3	PPIL2
Aqp9	RAB3GAP1
Slc25a26	S100A7A
Tmem198	RANBP3
Epb4.1l5	POLR1A
Vti1a	MMP17
Glt8d3	CCL25
Gpr107	AP2A2
Tmem206	ARHGEF19
Phf21b	ZBTB5
Ptpn1	ABBA-1
2410066E13Rik	DFFA
Ngfr	CLDN7
Hsd17b7	FAM107A
Bcr	SHANK1
Adrm1	KIF3B
Frmd4a	EYA2
Pldn	NCOA1
Prkag2	DLX1
Gpatch3	HIF1AN
Ntn2l	PDGFB
Jph3	HUWE1
Smad2	PLEKHB1
Gast	APCDD1
Slc25a22	C21orf62
Hpcal4	PLXNA1
Impact	FLJ45224
Dctn2	LIF
Cntfr	DVL3
Eif1b	HIVEP3
Rab1b	MOBKL2C
Git2	C15orf24
Plagl2	NT5C3L
Angel1	PCBP3
Zfp664	CAMKK2
Amotl1	NSMCE1
Cog2	N4BP1
Tgm2	CCDC13
Dot1l	EXOSC6
Rab43	GNL3L
Efcbp2	SMG7
Tjap1	FOXE3
Emp1	STX1A
Mlf2	GAS1
BC026590	FLJ22167
Adipor1	GARNL4
Homer1	GRIN1
Nxph2	KCTD10
Tspan9	TMEM180
Tmem50b	CHD5
4921506J03Rik	RHOBTB2
C330016O10Rik	TULP1
Pif1	CRTC3
Mon1b	FLYWCH1
Uso1	RABGEF1
Bcl11b	ZNF498
1300012G16Rik	PYCRL
Neurod2	SOX8
Zyx	CCDC77
Actl6b	BCL9L
Fzd1	RUFY1
Ubp1	CRTC1
Slc7a5	CACNA1C
Mkl1	FGFR1
Hap1	HOXC6
Ninj1	GPR17
Rnasek	TRIM11
Lpar2	PPIL2
Mpp2	FOXF1
Zfp3	TMEM16J
Ubn1	C18orf45
Axin2	FLJ37543
Pdxp	TMEM158
Padi2	MSR1
Rab3il1	RASL10B
Ncor2	TRIM65
Rab35	SDC2
Lbp	ZFPM2
2610109H07Rik	C14orf83
Fbxl8	TBC1D20
Gstcd	NAT10
Fto	MFN2
Crispld2	TMED1
Sparc	SCGB3A1
Cops7b	CDH22
Pkp1	CRAMP1L
Map3k7ip3	CRABP2
Ldb2	ASCC1
Vsig1	RAB15
Kctd21	DLX3
Smarca2	KIAA1529
Vps18	SIRPA
Rnf122	ATXN2L
Wnt16	ARHGAP6
Sp6	ZNF784
Nr2e1	LRRC8A
Gemin4	PLXNA2
Cldn11	ADARB1
Tmbim1	UBE3B
Dclk2	C8orf4
Vps28	DDIT4L
Gpr123	C21orf29
Hic2	SCARF2
Atrn	ELAVL1
Chst3	RGS12
Nptx2	CX3CR1
Pitpnm2	ZMIZ1
Slc25a13	PPARA
Ankrd13a	RTTN
Pomt2	UNC13A
Fyn	SURF4
Fbxo28	UCK1
Nckipsd	GMEB2
Ube2d1	FLJ22167
Gpc1	CNTN2
Bin3	FAM57A
Sv2b	ATP11A
Ophn1	ST3GAL2
Zdhhc7	HSDL2
Atp2b2	POLL
Rab1	C14orf159
Rybp	KIAA0664
Pnma2	SLC6A8
Dhcr24	ZBED3
Adamts18	STX17
Prr14	TMEM80
D6Wsu176e	EFHD1
Nup50	C1orf21
Numbl	RNASEH1
Siah2	CLIC5
Rcc1	SHANK2
Snd1	SUMO3
Atp1b2	TMEM119
Celsr1	ENC1
Tnrc6b	USH1G
Slc46a1	PRDM16
Ube2h	TMPRSS6
Ppp1cc	EMID1
Huwe1	PNMAL1
Nudcd3	RAB35
C1qa	ZBTB47
Gnpda1	SUSD1
Hoxd3	MKL1
Hexim1	S100A16
Flvcr2	SVOP
Acaca	SLC2A6
Comt	FAM152A
Zc3h12a	C15orf52
Eif6	ALDH4A1
Nf2	DMWD
Flt1	VTI1A
Mcf2l	PRKCB1
Arhgef15	KLF13
Matn4	PICK1
	TNK2
	ARHGDIA
	NRP2
	LRRC8A
	PML
	SLC30A9
	CACNG7
	C20orf196
	PNO1
	KIAA0247
	KIAA0152
	RP2
	PLEKHG4B
	TMCC3
	GPR124
	KIF21B
	SURF6
	GRB10
	PPP1R3B
	HIC2
	TP63
	MRPL15
	PLEKHN1
	C11orf63
	ATP11A
	UBP1
	KLC2
	TFCP2L1
	WBSCR18
	ELOVL2
	GNA12
	C7orf51
	EHD2
	SNIP
	HOXC9
	LINGO1
	TMEM105
	NR5A1
	IGSF9B
	SIGLEC1
	FAM78A
	SLC14A2
	GATAD2A
	MTHFR
	TMEM184A
	SECTM1
	LONRF2
	ANKRD54
	CDC25A
	TRIOBP
	OPRD1
	VAMP3
	ASXL1
	GATA5
	SIDT2
	LIPG
	SBK1
	ALDH4A1
	DENND1A
	TRDMT1
	CSF1
	SELS
	SCAMP4
	PHB
	ELFN2
	EDEM1
	CARM1
	LYN
	BRSK2
	ECE1
	GNB4
	SNF1LK
	SPPL2B
	SLC22A12
	PODXL
	TM9SF4
	CGREF1
	MEOX1
	BDKRB2
	ADRBK2
	PPM1H
	GRK5
	ELL
	CNTNAP2
	GGA2
	BST2
	RUNX1
	GRIA4
	SOX7
	NKX2-8
	EPB41L3
	TFE3
	JUP
	EIF2C2
	MAP9
	UBP1
	TIMM22
	STK24
	GNAS
	IQCE
	SLC6A12
	ZNF740
	SLC44A4
	CBX6
	SAPS1
	HPS1
	ZADH2
	FSCN1
	ESPNL
	PRAGMIN
	NLRP8
	PPP1CC
	SRGAP3
	MYADM
	POPDC2
	KCTD16
	USP40
	ACO2
	FAM123C
	SGCD
	JRK
	DIO2
	C8orf79
	ZBTB46
	RNF24
	C6orf47
	ADPRHL1
	PLAGL2
	ABCC4
	LIFR
	ACTN3
	C19orf29
	C19orf25
	PANX2
	LENG8
	CENPB
	BAZ1B
	UPF1
	SPPL2B
	CYCS
	LASS1
	MEOX1
	C1orf69
	RAB1B
	PPP1R16B
	FA2H
	RRP1B
	INPPL1
	PPAP2B
	GRIA4
	AMMECR1L
	MAFK
	N4BP3
	THBD
	ZNRF3
	RP1-21O18.1
	VIPR2
	FBXW11
	SF1
	FOXA2
	ZDHHC22
	UBOX5
	ZNRF1
	ZNF493
	MPV17L
	SOX1
	RSPO2
	ATCAY
	AARS
	ZNF512B
	PODN
	C14orf130
	SEC16A
	SEPT9
	ATP1B2
	FN3K
	DDX11
	PTK6
	TMEM18
	PPP2R4
	HS3ST3B1
	SPRN
	FBXO44
	SGSH
	UNC5C
	PITPNM2
	PLXNA3
	PDCD1
	KSR1
	IYD
	ADAM19
	DNASE1L1
	Gcom1
	PRKCSH
	HAND2
	NMUR1
	LMO1
	CACNA1H
	DPP6
	MUC13
	FGFRL1
	RAB11FIP3
	MXD4
	SHF
	TOLLIP
	EPM2AIP1
